# Supplementary material
Source: PubMed Central journal article supplement (PMC10750914)
Supplement: media-1.pdf [file media-1.pdf]

# Supplementary Tables

**Supplementary Table 1:** Tumor tissue-microarray metadata. Abbreviations: bladder cancer (BIC), colorectal cancer (CRC), head and neck squamous cell carcinomas (HNSCC), melanoma (Mel), breast cancer (BrC), non-small cell lung cancer (NSCLC), and ovarian cancer (OvC).

| Core index | Tissue type | Tumor | Patient number | PD-L1 status |
|------------|-------------|-------|----------------|--------------|
| 1          | BIC         | 1     | 1              | high         |
| 2          | BIC         | 1     | 1              | high         |
| 3          | BIC         | 1     | 1              | high         |
| 4          | BIC         | 0     | 1              | low          |
| 5          | BIC         | 0     | 1              | NaN          |
| 6          | BIC         | 1     | 2              | high         |
| 7          | BIC         | 1     | 2              | high         |
| 8          | BIC         | 1     | 2              | high         |
| 9          | BIC         | 1     | 3              | NaN          |
| 10         | BIC         | 1     | 3              | low          |
| 11         | BIC         | 1     | 5              | low          |
| 12         | BIC         | 1     | 5              | low          |
| 13         | BIC         | 0     | 4              | low          |
| 14         | BIC         | 0     | 4              | low          |
| 15         | BIC         | 1     | 4              | low          |
| 16         | BIC         | 1     | 4              | low          |
| 17         | BIC         | 1     | 4              | low          |
| 18         | BIC         | 0     | 3              | low          |
| 19         | BIC         | 0     | 3              | low          |
| 20         | BIC         | 1     | 3              | low          |
| 21         | BIC         | 1     | 5              | low          |
| 22         | CRC         | 1     | 1              | low          |
| 23         | CRC         | 1     | 1              | low          |
| 24         | CRC         | 1     | 1              | low          |
| 25         | CRC         | 0     | 1              | low          |
| 26         | CRC         | 0     | 1              | low          |
| 27         | CRC         | 1     | 2              | low          |
| 28         | CRC         | 1     | 2              | low          |

---

|    |       |   |   |      |
|----|-------|---|---|------|
| 29 | CRC   | 1 | 2 | low  |
| 30 | CRC   | 0 | 2 | low  |
| 31 | CRC   | 0 | 4 | low  |
| 32 | CRC   | 1 | 4 | low  |
| 33 | CRC   | 1 | 4 | low  |
| 34 | CRC   | 1 | 4 | low  |
| 35 | CRC   | 0 | 3 | NaN  |
| 36 | CRC   | 0 | 3 | low  |
| 37 | CRC   | 1 | 3 | high |
| 38 | CRC   | 1 | 3 | low  |
| 39 | CRC   | 1 | 3 | high |
| 40 | CRC   | 0 | 2 | low  |
| 41 | CRC   | 0 | 4 | high |
| 42 | CRC   | 1 | 5 | high |
| 43 | CRC   | 1 | 5 | high |
| 44 | CRC   | 1 | 5 | high |
| 45 | CRC   | 0 | 5 | high |
| 46 | CRC   | 0 | 5 | high |
| 47 | CRC   | 1 | 6 | high |
| 48 | CRC   | 1 | 6 | high |
| 49 | CRC   | 1 | 6 | high |
| 50 | HNSCC | 1 | 1 | high |
| 51 | HNSCC | 1 | 3 | high |
| 52 | HNSCC | 0 | 2 | high |
| 53 | HNSCC | 0 | 2 | low  |
| 54 | HNSCC | 1 | 2 | low  |
| 55 | HNSCC | 1 | 2 | high |
| 56 | HNSCC | 1 | 2 | high |
| 57 | HNSCC | 0 | 1 | high |
| 58 | HNSCC | 0 | 1 | high |
| 59 | HNSCC | 1 | 1 | low  |
| 60 | HNSCC | 1 | 1 | high |
| 61 | HNSCC | 1 | 3 | low  |
| 62 | HNSCC | 1 | 3 | high |

---

---

|    |       |   |   |      |
|----|-------|---|---|------|
| 63 | HNSCC | 0 | 3 | low  |
| 64 | HNSCC | 0 | 3 | high |
| 65 | HNSCC | 1 | 4 | low  |
| 66 | HNSCC | 1 | 4 | high |
| 67 | HNSCC | 1 | 4 | low  |
| 68 | HNSCC | 0 | 4 | low  |
| 69 | HNSCC | 0 | 4 | high |
| 70 | HNSCC | 1 | 5 | high |
| 71 | Mel   | 1 | 2 | high |
| 72 | Mel   | 0 | 1 | low  |
| 73 | Mel   | 0 | 1 | low  |
| 74 | Mel   | 1 | 1 | low  |
| 75 | Mel   | 1 | 1 | low  |
| 76 | Mel   | 1 | 1 | low  |
| 77 | HNSCC | 0 | 5 | NaN  |
| 78 | HNSCC | 0 | 5 | low  |
| 79 | HNSCC | 1 | 5 | high |
| 80 | HNSCC | 1 | 5 | low  |
| 81 | Mel   | 1 | 2 | low  |
| 82 | Mel   | 1 | 2 | high |
| 83 | Mel   | 0 | 2 | high |
| 84 | Mel   | 0 | 2 | high |
| 85 | Mel   | 1 | 3 | high |
| 86 | Mel   | 1 | 3 | low  |
| 87 | Mel   | 1 | 3 | NaN  |
| 88 | Mel   | 1 | 4 | low  |
| 89 | Mel   | 1 | 4 | low  |
| 90 | Mel   | 1 | 4 | low  |
| 91 | BrC   | 1 | 3 | high |
| 92 | BrC   | 1 | 3 | high |
| 93 | BrC   | 0 | 2 | high |
| 94 | BrC   | 0 | 2 | high |
| 95 | BrC   | 1 | 2 | high |
| 96 | BrC   | 1 | 2 | high |

---

---

|     |       |   |   |      |
|-----|-------|---|---|------|
| 97  | BrC   | 1 | 2 | low  |
| 98  | BrC   | 1 | 1 | low  |
| 99  | BrC   | 1 | 1 | low  |
| 100 | BrC   | 1 | 1 | low  |
| 101 | BrC   | 1 | 3 | high |
| 102 | BrC   | 0 | 3 | high |
| 103 | BrC   | 0 | 3 | low  |
| 104 | BrC   | 1 | 4 | low  |
| 105 | BrC   | 1 | 4 | low  |
| 106 | BrC   | 1 | 4 | low  |
| 107 | BrC   | 0 | 4 | low  |
| 108 | BrC   | 0 | 4 | NaN  |
| 109 | NSCLC | 1 | 1 | NaN  |
| 110 | NSCLC | 1 | 1 | low  |
| 111 | NSCLC | 1 | 3 | high |
| 112 | NSCLC | 1 | 3 | high |
| 113 | NSCLC | 0 | 2 | high |
| 114 | NSCLC | 0 | 2 | high |
| 115 | NSCLC | 1 | 2 | high |
| 116 | NSCLC | 1 | 2 | high |
| 117 | NSCLC | 1 | 2 | high |
| 118 | NSCLC | 0 | 1 | high |
| 119 | NSCLC | 0 | 1 | high |
| 120 | NSCLC | 1 | 1 | high |
| 121 | NSCLC | 1 | 3 | high |
| 122 | NSCLC | 0 | 3 | high |
| 123 | NSCLC | 0 | 3 | low  |
| 124 | NSCLC | 1 | 4 | low  |
| 125 | NSCLC | 1 | 4 | low  |
| 126 | NSCLC | 1 | 4 | low  |
| 127 | NSCLC | 0 | 4 | high |
| 128 | NSCLC | 0 | 4 | high |
| 129 | NSCLC | 1 | 5 | high |
| 130 | NSCLC | 1 | 5 | low  |

---

---

|     |        |   |   |      |
|-----|--------|---|---|------|
| 131 | OvC    | 1 | 1 | low  |
| 132 | OvC    | 1 | 1 | low  |
| 133 | NSCLC  | 0 | 4 | high |
| 134 | NSCLC  | 0 | 4 | high |
| 135 | NSCLC  | 1 | 4 | low  |
| 136 | NSCLC  | 1 | 3 | low  |
| 137 | NSCLC  | 1 | 3 | low  |
| 138 | NSCLC  | 0 | 3 | high |
| 139 | NSCLC  | 0 | 4 | high |
| 140 | NSCLC  | 1 | 4 | high |
| 141 | OvC    | 1 | 4 | low  |
| 142 | OvC    | 1 | 1 | low  |
| 143 | OvC    | 1 | 5 | low  |
| 144 | OvC    | 1 | 5 | high |
| 145 | OvC    | 1 | 5 | low  |
| 146 | OvC    | 1 | 5 | low  |
| 147 | OvC    | 1 | 5 | low  |
| 148 | OvC    | 1 | 6 | high |
| 149 | OvC    | 1 | 6 | high |
| 150 | OvC    | 1 | 6 | high |
| 151 | Tonsil | 0 | 1 | high |
| 152 | Tonsil | 0 | 1 | high |
| 153 | OvC    | 1 | 6 | high |
| 154 | OvC    | 1 | 6 | low  |
| 155 | OvC    | 1 | 6 | high |
| 156 | OvC    | 0 | 5 | high |
| 157 | OvC    | 0 | 5 | low  |
| 158 | OvC    | 1 | 5 | low  |
| 159 | OvC    | 1 | 5 | high |
| 160 | OvC    | 1 | 5 | high |
| 161 | Tonsil | 0 | 1 | high |
| 162 | Tonsil | 0 | 2 | low  |
| 163 | Tonsil | 0 | 2 | low  |
| 164 | Tonsil | 0 | 2 | high |

---

|     |            |   |   |      |
|-----|------------|---|---|------|
| 165 | Tonsil     | 0 | 3 | high |
| 166 | Tonsil     | 0 | 3 | low  |
| 167 | Tonsil     | 0 | 3 | low  |
| 168 | Lymph node | 0 | 1 | high |
| 169 | Lymph node | 0 | 1 | high |
| 170 | Lymph node | 0 | 1 | high |

**Supplementary Table 2:** Normal tissue-microarray metadata.

| <b>Core index</b> | <b>Tissue type</b> |
|-------------------|--------------------|
| 1,2,3             | Pancreas           |
| 4,5,6             | Prostate           |
| 7,8               | Renal              |
| 9,10              | Bladder            |
| 11,12             | Ovary              |
| 13,14,15          | Lung               |
| 16,17,18          | Colon              |
| 19,20,21          | Kidney             |
| 22,23,24          | Heart              |
| 25,26,27          | Tonsil             |
| 28,29,30          | Liver              |
| 31,32,33          | Spleen             |
| 34,35,36          | Lymph node         |
| 37,38,39          | Thyroid            |
| 40,41,42          | Breast             |
| 43,44,45          | Skin               |

**Supplementary Table 3:** Gene panel of test iST platforms.

| <b>Xenium breast</b> | <b>Xenium lung</b> | <b>Xenium multi-tissue</b> | <b>MERSCOPE breast</b> | <b>MERSCOPE lung</b> | <b>CosMx 1k</b> |
|----------------------|--------------------|----------------------------|------------------------|----------------------|-----------------|
| ABCC11               | ACE                | ABCC11                     | ABCC11                 | ABCC2                | AATK            |
| ACTA2                | ACE2               | ACE2                       | ADAM9                  | ACKR1                | ABL1            |
| ACTG2                | ACKR1              | ACKR1                      | ADGRE5                 | AGER                 | ABL2            |
| ADAM9                | ADAM17             | ACTA2                      | ADH1B                  | AGR3                 | ACACB           |

---

|          |          |          |          |          |        |
|----------|----------|----------|----------|----------|--------|
| ADGRE5   | ADAM28   | ACTG2    | ADIPOQ   | AIF1     | ACE    |
| ADH1B    | ADAMTS1  | ADAM28   | AGR3     | AKR1B10  | ACKR1  |
| ADIPOQ   | ADGRL4   | ADAMTS1  | AIF1     | AKR1C1   | ACKR3  |
| AGR3     | AGER     | ADGRE1   | AKR1C1   | AKR1C2   | ACKR4  |
| AIF1     | AGR3     | ADGRL4   | AKR1C3   | ANKRD28  | ACP5   |
| AKR1C1   | AIF1     | ADH1C    | ALDH1A3  | ASCL1    | ACTA2  |
| AKR1C3   | ANPEP    | ADH4     | ANGPT2   | ATF3     | ACTG2  |
| ALDH1A3  | APOD     | ADIPOQ   | ANKRD28  | ATF4     | ACVR1  |
| ANGPT2   | APOLD1   | AGER     | ANKRD29  | ATF6     | ACVR1B |
| ANKRD28  | AQP9     | AGR3     | ANKRD30A | ATG7     | ACVR2A |
| ANKRD29  | AREG     | AHSP     | APOBEC3A | ATP2A3   | ACVRL1 |
| ANKRD30A | ARL14    | AIF1     | APOBEC3B | AXL      | ADGRA2 |
| APOBEC3A | ASCL1    | ALAS2    | APOC1    | BANK1    | ADGRA3 |
| APOBEC3B | ASCL2    | ALDH1A3  | AQP1     | BAX      | ADGRE2 |
| APOC1    | ASCL3    | AMY2A    | AR       | BCL2     | ADGRE5 |
| AQP1     | ATP1B1   | ANGPT2   | AVPR1A   | BCL2L1   | ADGRF1 |
| AQP3     | BAIAP2L1 | ANPEP    | BACE2    | BCL2L11  | ADGRF3 |
| AR       | BANK1    | APCDD1   | BANK1    | BPIFA1   | ADGRF5 |
| AVPR1A   | BCAS1    | APOA5    | BASP1    | C1QC     | ADGRG1 |
| BACE2    | BMX      | APOBEC3A | C15orf48 | C20orf85 | ADGRG3 |
| BANK1    | CA4      | APOLD1   | C1QA     | CCL5     | ADGRG5 |
| BASP1    | CCDC78   | AQP2     | C1QC     | CCNA1    | ADGRG6 |
| C15orf48 | CCNA1    | AQP3     | C2orf42  | CCNB2    | ADGRL1 |
| C1QA     | CCNB2    | AQP8     | C5orf46  | CCR7     | ADGRL2 |
| C1QC     | CCR7     | AQP9     | C6orf132 | CD14     | ADGRL4 |
| C2orf42  | CD14     | AR       | CAV1     | CD19     | ADGRV1 |
| C5orf46  | CD163    | ARFGEF3  | CAVIN2   | CD1A     | ADIPOQ |
| C6orf132 | CD19     | ASCL1    | CCDC6    | CD1C     | ADIRF  |
| CAV1     | CD1A     | ASCL3    | CCDC80   | CD2      | ADM2   |
| CAVIN2   | CD1C     | ASPN     | CCL5     | CD247    | AGR2   |
| CCDC6    | CD2      | BAMBI    | CCL8     | CD27     | AHI1   |
| CCDC80   | CD24     | BANK1    | CCND1    | CD274    | AHR    |
| CCL5     | CD247    | BASP1    | CCPG1    | CD28     | AIF1   |
| CCL8     | CD27     | BBOX1    | CCR7     | CD3D     | AKT1   |

---

|          |         |          |          |         |         |
|----------|---------|----------|----------|---------|---------|
| CCND1    | CD274   | BCL2L11  | CD14     | CD3G    | ALCAM   |
| CCPG1    | CD28    | BMX      | CD163    | CD4     | ALOX5AP |
| CCR7     | CD300E  | BTNL9    | CD19     | CD44    | ANGPT1  |
| CD14     | CD34    | C15orf48 | CD247    | CD52    | ANGPT2  |
| CD163    | CD38    | C1orf162 | CD27     | CD68    | ANGPTL1 |
| CD19     | CD3D    | C1orf194 | CD274    | CD69    | ANKRD1  |
| CD247    | CD3E    | C20orf85 | CD3E     | CD79A   | ANXA1   |
| CD27     | CD4     | C5orf46  | CD3G     | CD79B   | ANXA2   |
| CD274    | CD40    | C6orf118 | CD4      | CD86    | ANXA4   |
| CD3E     | CD40LG  | C7       | CD68     | CD8A    | APOA1   |
| CD3G     | CD68    | CA4      | CD69     | CD8B    | APOC1   |
| CD4      | CD70    | CAPN8    | CD79A    | CDH26   | APOD    |
| CD68     | CD79A   | CAV1     | CD79B    | CDK1    | APOE    |
| CD69     | CD80    | CAVIN1   | CD80     | CENPF   | APP     |
| CD79A    | CD86    | CAVIN2   | CD83     | CFTR    | AQP3    |
| CD79B    | CD8A    | CCDC39   | CD86     | CGA     | AR      |
| CD80     | CD8B    | CCDC78   | CD8A     | CHAC1   | AREG    |
| CD83     | CDH1    | CCL19    | CD9      | CHGB    | ARF1    |
| CD86     | CDK1    | CCL27    | CD93     | CLDN5   | ARG1    |
| CD8A     | CENPF   | CCL5     | CDC42EP1 | CPA3    | ARHGDB  |
| CD9      | CFB     | CCNB2    | CDH1     | CREB3L4 | ARID5B  |
| CD93     | CFTR    | CCR2     | CEACAM6  | CRELD2  | ATF3    |
| CDC42EP1 | CHIT1   | CCR7     | CEACAM8  | CTLA4   | ATG10   |
| CDH1     | CLDN5   | CD14     | CENPF    | CTNNB1  | ATG12   |
| CEACAM6  | CLEC10A | CD163    | CLEC14A  | CXCL13  | ATG5    |
| CEACAM8  | CLEC12A | CD19     | CLEC9A   | CXCL14  | ATM     |
| CENPF    | CLEC4E  | CD1A     | CLECL1   | CXCL9   | ATP5F1B |
| CLEC14A  | CNN1    | CD1C     | CLIC6    | CXCR4   | ATP5F1E |
| CLEC9A   | COL5A2  | CD1E     | CPA3     | CXCR5   | ATR     |
| CLECL1   | COL8A1  | CD2      | CRISPLD2 | DCN     | AXL     |
| CLIC6    | CP      | CD247    | CTH      | DCTPP1  | AZGP1   |
| CPA3     | CSPG4   | CD27     | CTLA4    | DDIT3   | AZU1    |
| CRISPLD2 | CSTA    | CD274    | CTSG     | DERL3   | B2M     |
| CTH      | CTLA4   | CD28     | CTTN     | DIRAS3  | B3GNT7  |

|          |         |         |          |          |          |
|----------|---------|---------|----------|----------|----------|
| CTLA4    | CTSL    | CD300E  | CX3CR1   | DMBT1    | BAG3     |
| CTSG     | CTTN    | CD34    | CXCL12   | DNAJB9   | BASP1    |
| CTTN     | CXCL10  | CD3D    | CXCL16   | DUOX1    | BAX      |
| CX3CR1   | CXCL13  | CD3E    | CXCL5    | EGFR     | BBLN     |
| CXCL12   | CXCL5   | CD4     | CXCR4    | EHMT1    | BCL2     |
| CXCL16   | CXCL6   | CD5L    | CYTIP    | EMG1     | BCL2L1   |
| CXCL5    | CXCL9   | CD68    | DAPK3    | EPCAM    | BECN1    |
| CXCR4    | CXCR5   | CD69    | DNAAF1   | EREG     | BEST1    |
| CYTIP    | CXCR6   | CD70    | DNTTIP1  | ERLEC1   | BGN      |
| DAPK3    | CYP2F1  | CD79A   | DPT      | ERN2     | BID      |
| DMKN     | DAPK2   | CD83    | DSC2     | FAS      | BIRC3    |
| DNAAF1   | DCLK1   | CD86    | DSP      | FASLG    | BIRC5    |
| DNTTIP1  | DES     | CD8A    | DST      | FCER1A   | BMP1     |
| DPT      | DGKG    | CD93    | DUSP2    | FCER1G   | BMP2     |
| DSC2     | DIRAS3  | CDH16   | DUSP5    | FCGBP    | BMP3     |
| DSP      | DMBT1   | CDK1    | EGFL7    | FCGR3A   | BMP4     |
| DST      | DNAJB9  | CENPF   | EGFR     | FCN1     | BMP5     |
| DUSP2    | DPP6    | CFAP53  | EIF4EBP1 | FCN3     | BMP7     |
| DUSP5    | DUOX1   | CFB     | ENAH     | FGFBP2   | BMPR1A   |
| EGFL7    | ECSCR   | CFHR1   | EPCAM    | FKBP11   | BMPR2    |
| EGFR     | EGFR    | CFHR3   | ERBB2    | FOXP3    | BRAF     |
| EIF4EBP1 | EHF     | CFTR    | ERN1     | GCLM     | BRCA1    |
| ENAH     | ELF3    | CHGA    | ESM1     | GKN2     | BST1     |
| EPCAM    | ENAH    | CLCA1   | ESR1     | GNG11    | BST2     |
| ERBB2    | EPCAM   | CLCA2   | FAM107B  | GNLY     | BTF3     |
| ERN1     | ETV5    | CLEC10A | FASN     | GPR183   | BTG1     |
| ESM1     | F3      | CLEC14A | FBLN1    | GSR      | BTK      |
| ESR1     | FABP3   | CLEC4E  | FCER1A   | GZMA     | C11orf96 |
| FAM107B  | FAM184A | CLECL1  | FCER1G   | GZMB     | C1QA     |
| FAM49A   | FAS     | CLIC6   | FCGR3A   | GZMK     | C1QB     |
| FASN     | FASLG   | CNN1    | FGL2     | HAVCR2   | C1QC     |
| FBLN1    | FASN    | COCH    | FLNB     | HERPUD1  | C5AR2    |
| FCER1A   | FBN1    | COL17A1 | FOXA1    | HLA-DQA1 | CACNA1C  |
| FCER1G   | FCER1A  | COL5A2  | FOXC2    | HLA-DQB1 | CALB1    |

---

|        |        |          |        |        |            |
|--------|--------|----------|--------|--------|------------|
| FCGR3A | FCGR1A | CPA3     | FOXP3  | HMGA1  | CALD1      |
| FGL2   | FCGR3A | CRHBP    | FSTL3  | HMOX1  | CALM1      |
| FLNB   | FCMR   | CRISPLD2 | GATA3  | HSPA5  | CALM2      |
| FOXA1  | FCN1   | CSF2RA   | GJB2   | HYOU1  | CALM3      |
| FOXC2  | FCN3   | CSF3     | GLIPR1 | ICAM1  | CAMP       |
| FOXP3  | FGFBP2 | CTLA4    | GNLY   | IDH1   | CARMN      |
| FSTL3  | FGFR4  | CTSG     | GPR183 | IFIT1  | CASP3      |
| GATA3  | FKBP11 | CTSK     | GZMA   | IFIT2  | CASP8      |
| GJB2   | FOXI1  | CXCL10   | GZMK   | IFIT3  | CASR       |
| GLIPR1 | FOXJ1  | CXCL2    | HAVCR2 | IL1A   | CAV1       |
| GNLY   | FOXP3  | CXCL6    | HMGA1  | IL2RA  | CCDC80     |
| GPR183 | FSCN1  | CXCL9    | HOXD8  | IL37   | CCL11      |
| GZMA   | GJA5   | CXCR4    | HOXD9  | IL4R   | CCL13      |
| GZMK   | GKN2   | CYP1A1   | HPX    | IL7R   | CCL15      |
| HAVCR2 | GLCCI1 | CYP2A7   | IGF1   | IRF1   | CCL17      |
| HMGA1  | GLIPR2 | CYP2B6   | IGSF6  | ISG20  | CCL18      |
| HOOK2  | GNG11  | CYP2F1   | IL2RA  | ITM2C  | CCL19      |
| HOXD8  | GPI    | CYP3A4   | IL2RG  | KDR    | CCL2       |
| HOXD9  | GPR171 | CYP4B1   | IL3RA  | KIT    | CCL20      |
| HPX    | GPR183 | CYTIP    | IL7R   | KLRB1  | CCL21      |
| IGF1   | GPR34  | DERL3    | ITGAM  | KLRC1  | CCL22      |
| IGSF6  | GPX2   | DES      | ITGAX  | KRT15  | CCL26      |
| IL2RA  | GZMA   | DIRAS3   | ITM2C  | KRT18  | CCL28      |
| IL2RG  | GZMB   | DMBT1    | JUP    | LAG3   | CCL3/L1/L3 |
| IL3RA  | GZMK   | DNAAF1   | KDR    | LEF1   | CCL4/L1/L2 |
| IL7R   | HAVCR2 | DNASE1L3 | KIT    | LGR5   | CCL5       |
| ITGAM  | HIF1A  | DPEP1    | KLF5   | LILRA4 | CCL8       |
| ITGAX  | HIGD1B | DPT      | KLRB1  | LMAN1  | CCND1      |
| ITM2C  | HMGCS1 | DST      | KLRC1  | LTB    | CCR1       |
| JUP    | HP     | DUSP2    | KLRD1  | LTF    | CCR10      |
| KARS   | HPGDS  | ECSCR    | KLRF1  | LUM    | CCR2       |
| KDR    | ICA1   | EDN1     | KRT23  | MANF   | CCR5       |
| KIT    | IGF1   | EDNRB    | KRT7   | MARCO  | CCR7       |
| KLF5   | IGFBP3 | EGFL7    | LAG3   | MCEMP1 | CCRL2      |

---

---

|        |          |        |          |         |        |
|--------|----------|--------|----------|---------|--------|
| KLRB1  | IL1RL1   | EGFR   | LDHB     | MFAP5   | CD14   |
| KLRC1  | IL7R     | EHF    | LGALS5   | MGST1   | CD163  |
| KLRD1  | IQGAP2   | ELF5   | LILRA4   | MKI67   | CD164  |
| KLRF1  | IRF8     | EPCAM  | LPL      | MMP10   | CD19   |
| KRT14  | ITGAM    | ERBB2  | LPXN     | MMP12   | CD1C   |
| KRT23  | ITGB4    | ERG    | LRRC15   | MS4A1   | CD2    |
| KRT5   | KCNK3    | ESR1   | LTB      | MS4A7   | CD209  |
| KRT6B  | KDR      | FAS    | LUM      | MUC5B   | CD22   |
| KRT7   | KIT      | FBLN1  | LY86     | MYC     | CD24   |
| KRT8   | KLF5     | FBN1   | LYPD3    | MYDGF   | CD27   |
| LAG3   | KLK11    | FCER1A | LYZ      | NAPSA   | CD274  |
| LARS   | KLRB1    | FCGR1A | MAP3K8   | NFKB1   | CD276  |
| LDHB   | KLRC1    | FCGR3A | MDM2     | NHSL2   | CD28   |
| LGALS5 | KLRD1    | FCN1   | MKI67    | NKG7    | CD300A |
| LILRA4 | KRT15    | FCN2   | MLPH     | NKX2-1  | CD33   |
| LPL    | KRT7     | FGFBP1 | MMP1     | NUCB2   | CD34   |
| LPXN   | LAG3     | FGFBP2 | MMP12    | NUTF2   | CD36   |
| LRRC15 | LAMC3    | FGL2   | MMP2     | OAS2    | CD37   |
| LTB    | LCK      | FHL2   | MMRN2    | OAS3    | CD38   |
| LUM    | LGALS3BP | FKBP11 | MNDA     | PAEP    | CD3D   |
| LY86   | LGR5     | FOXA1  | MRC1     | PCNA    | CD3E   |
| LYPD3  | LGR6     | FOXI1  | MS4A1    | PDCD1   | CD3G   |
| LYZ    | LILRA4   | FOXJ1  | MUC6     | PDIA3   | CD4    |
| MAP3K8 | LILRA5   | FOXP3  | MYBPC1   | PDIA4   | CD40   |
| MDM2   | LILRB2   | FSTL3  | MYLK     | PDIA6   | CD40LG |
| MKI67  | LILRB4   | FXYD2  | MYO5B    | PECAM1  | CD44   |
| MLPH   | LMOD1    | GATA2  | MZB1     | PGC     | CD47   |
| MMP1   | LTBP2    | GATM   | NCAM1    | PIM2    | CD48   |
| MMP12  | LTF      | GCG    | NDUFA4L2 | PLPP5   | CD52   |
| MMP2   | LYVE1    | GDF15  | NKG7     | POSTN   | CD53   |
| MMRN2  | MALL     | GEM    | NOSTRIN  | PRDX4   | CD55   |
| MNDA   | MAP7     | GHRL   | OCIAD2   | PTPRC   | CD58   |
| MRC1   | MARCO    | GKN2   | OPRPN    | RACGAP1 | CD59   |
| MS4A1  | MCEMP1   | GLIPR1 | OXTR     | RAMP2   | CD5L   |

---

---

|          |          |          |          |           |         |
|----------|----------|----------|----------|-----------|---------|
| MUC6     | MEDAG    | GLYATL1  | PCLAF    | RHOA      | CD63    |
| MYBPC1   | MET      | GNG11    | PDCD1    | RNASE1    | CD68    |
| MYH11    | MFAP5    | GPLY     | PDCD1LG2 | S100A12   | CD69    |
| MYLK     | MIS18BP1 | GPC1     | PDE4A    | SAA2      | CD70    |
| MYO5B    | MKI67    | GPC3     | PDGFRA   | SCG2      | CD74    |
| MZB1     | MMP12    | GPR183   | PDGFRB   | SEC11C    | CD79A   |
| NARS     | MMP9     | GPRC5A   | PDK4     | SELENOS   | CD80    |
| NCAM1    | MMRN1    | GPX2     | PECAM1   | SFRP2     | CD81    |
| NDUFA4L2 | MPEG1    | GYPA     | PELI1    | SFTA2     | CD83    |
| NKG7     | MS4A1    | GYPB     | PGR      | SFTPD     | CD84    |
| NOSTRIN  | MS4A2    | GZMA     | PIM1     | SLC1A3    | CD86    |
| OCIAD2   | MS4A4A   | GZMB     | PLD4     | SLC25A37  | CD8A    |
| OPRPN    | MTUS1    | GZMK     | POSTN    | SLC25A4   | CD8B    |
| OXTR     | MUC1     | HAMP     | PPARG    | SLC2A1    | CD9     |
| PCLAF    | MUC5B    | HAVCR2   | PRDM1    | SLC7A11   | CD93    |
| PDCD1    | MYC      | HEMGN    | PRF1     | SMAD4     | CDH1    |
| PDCD1LG2 | MYH11    | HEPACAM2 | PTN      | SNAI1     | CDH11   |
| PDE4A    | MYO6     | HES4     | PTPRC    | SNAI2     | CDH19   |
| PDGFRA   | MZB1     | HIGD1B   | PTRHD1   | SNCA      | CDH5    |
| PDGFRB   | NCEH1    | HLA-DQB2 | RAB30    | SOD2      | CDKN1A  |
| PDK4     | NFKB1    | HMGCS2   | RAMP2    | SOX9      | CDKN3   |
| PECAM1   | NID1     | HPGDS    | RAPGEF3  | SPARCL1   | CEACAM1 |
| PELI1    | NKG7     | HPX      | RHOH     | SPCS2     | CEACAM6 |
| PGR      | NTN4     | IGF1     | RORC     | SPCS3     | CELSR1  |
| PIGR     | NTRK2    | IGSF6    | RTKN2    | SSR3      | CELSR2  |
| PIM1     | OTUD7B   | IL1R2    | RUNX1    | STAT1     | CENPF   |
| PLD4     | P2RX1    | IL1RL1   | SCD      | STAT6     | CFD     |
| POSTN    | PAMR1    | IL2RA    | SCGB2A1  | TCL1A     | CFLAR   |
| PPARG    | PCNA     | IL3RA    | SDC4     | TGFB1     | CHEK1   |
| PRDM1    | PCOLCE2  | IL7R     | SEC11C   | TNFRSF13C | CHEK2   |
| PRF1     | PDCD1    | INMT     | SEC24A   | TNFRSF17  | CHI3L1  |
| PTGDS    | PDCD1LG2 | INS      | SELL     | TNFRSF9   | CIDEA   |
| PTN      | PDGFRA   | IRF8     | SERPINB9 | TOP1      | CIITA   |
| PTPRC    | PDGFRB   | KCNK3    | SFRP1    | TOP2A     | CLCF1   |

---

---

|          |          |        |          |        |         |
|----------|----------|--------|----------|--------|---------|
| PTRHD1   | PDPN     | KCNMA1 | SFRP4    | TP63   | CLDN4   |
| QARS     | PEBP4    | KIT    | SH3YL1   | TRAC   | CLEC10A |
| RAB30    | PI3      | KLK11  | SLAMF1   | TTC19  | CLEC12A |
| RAMP2    | PIM1     | KLRB1  | SLAMF7   | UBE2J1 | CLEC14A |
| RAPGEF3  | PIM2     | KLRC1  | SLC25A37 | UBE2S  | CLEC1A  |
| RHOH     | PLA2G2A  | KLRD1  | SLC5A6   | UCHL3  | CLEC2B  |
| RORC     | PLA2G4F  | KNG1   | SMAP2    | UGDH   | CLEC2D  |
| RTKN2    | PLA2G7   | KRT20  | SMS      | UQCRHL | CLEC4A  |
| RUNX1    | PLN      | KRT7   | SNAI1    | VEGFA  | CLEC4D  |
| S100A14  | PLVAP    | LAG3   | SOX17    | VPREB3 | CLEC4E  |
| S100A4   | POU2AF1  | LAMP3  | SOX18    | WFDC2  | CLEC5A  |
| S100A8   | PROX1    | LGI4   | SPIB     | ZEB1   | CLEC7A  |
| SCD      | PTGS1    | LGR5   | SQLE     |        | CLOCK   |
| SCGB2A1  | RAMP2    | LIF    | SRPK1    |        | CLU     |
| SDC4     | RARRES1  | LILRA4 | SSTR2    |        | CMKLR1  |
| SEC11C   | RBP4     | LILRA5 | STC1     |        | CNTFR   |
| SEC24A   | RERGL    | LILRB2 | SVIL     |        | COL11A1 |
| SELL     | RETN     | LILRB4 | TAC1     |        | COL12A1 |
| SERHL2   | RGS5     | LPL    | TACSTD2  |        | COL14A1 |
| SERPINA3 | RND1     | LTBP2  | TCEAL7   |        | COL15A1 |
| SERPINB9 | RUNX3    | LY6D   | TCF4     |        | COL16A1 |
| SFRP1    | S100A12  | LY86   | TCF7     |        | COL17A1 |
| SFRP4    | S100A7   | LYVE1  | TCIM     |        | COL18A1 |
| SH3YL1   | S100B    | MALL   | TCL1A    |        | COL1A1  |
| SLAMF1   | SAMD3    | MAMDC2 | TENT5C   |        | COL1A2  |
| SLAMF7   | SCEL     | MARCO  | TFAP2A   |        | COL21A1 |
| SLC25A37 | SEC11C   | MCEMP1 | THAP2    |        | COL27A1 |
| SLC5A6   | SELE     | MCF2L  | TIFA     |        | COL3A1  |
| SMAP2    | SELL     | MDM2   | TIGIT    |        | COL4A1  |
| SMS      | SELP     | MEDAG  | TIMP4    |        | COL4A2  |
| SNAI1    | SEMA3B   | MEF2C  | TMEM147  |        | COL4A5  |
| SOX17    | SEMA3C   | MEST   | TNFRSF17 |        | COL5A1  |
| SOX18    | SERPINA3 | MET    | TOMM7    |        | COL5A2  |
| SPIB     | SFRP2    | MFAP5  | TOP2A    |        | COL5A3  |

---

---

|          |           |           |         |           |
|----------|-----------|-----------|---------|-----------|
| SQLE     | SFTA2     | MKI67     | TPD52   | COL6A1    |
| SRPK1    | SFTPD     | MLANA     | TRAC    | COL6A2    |
| SSTR2    | SHANK3    | MLPH      | TRAPPC3 | COL6A3    |
| STC1     | SLC15A2   | MMRN1     | TRIB1   | COL8A1    |
| SVIL     | SLC18A2   | MMRN2     | TUBA4A  | COL9A2    |
| TAC1     | SLC1A3    | MNDA      | TUBB2B  | COL9A3    |
| TACSTD2  | SLC2A1    | MPEG1     | UCP1    | COTL1     |
| TCEAL7   | SLC7A11   | MRC1      | USP53   | COX4I2    |
| TCF4     | SLIT3     | MS4A1     | VOPP1   | CPA3      |
| TCF7     | SMIM24    | MS4A2     | VWF     | CPB1      |
| TCIM     | SOX2      | MS4A4A    | ZEB1    | CRIP1     |
| TCL1A    | SOX9      | MS4A6A    | ZEB2    | CRP       |
| TENT5C   | SPDEF     | MTRNR2L11 | ZNF562  | CRYAB     |
| TFAP2A   | SPIB      | MYBPC1    |         | CSF1      |
| THAP2    | STAT4     | MYC       |         | CSF1R     |
| TIFA     | STC1      | MYH11     |         | CSF2      |
| TIGIT    | STEAP4    | MYLK      |         | CSF2RA    |
| TIMP4    | SVEP1     | MZB1      |         | CSF2RB    |
| TMEM147  | SYK       | NAT8      |         | CSF3      |
| TNFRSF17 | TACSTD2   | NKG7      |         | CSF3R     |
| TOMM7    | TC2N      | NPDC1     |         | CSHL1     |
| TOP2A    | TCL1A     | NTN4      |         | CSK       |
| TPD52    | THBS2     | OGN       |         | CSPG4     |
| TPSAB1   | THY1      | OPRPN     |         | CST7      |
| TRAC     | TM4SF18   | PCNA      |         | CSTB      |
| TRAF4    | TM4SF4    | PCOLCE    |         | CTLA4     |
| TRAPPC3  | TMC5      | PCP4      |         | CTNNB1    |
| TRIB1    | TMEM100   | PCSK2     |         | CTSD      |
| TUBA4A   | TMPRSS2   | PDCD1     |         | CTSG      |
| TUBB2B   | TNFRSF13B | PDGFRA    |         | CTSW      |
| UCP1     | TNFRSF13C | PDGFRB    |         | CUZD1     |
| USP53    | TNFRSF17  | PDPN      |         | CX3CL1    |
| VOPP1    | TNFRSF18  | PEBP4     |         | CX3CR1    |
| VWF      | TOP2A     | PECAM1    |         | CXCL1/2/3 |

---

---

|        |        |         |        |
|--------|--------|---------|--------|
| WARS   | TP63   | PGR     | CXCL10 |
| ZEB1   | TP73   | PLA2G7  | CXCL12 |
| ZEB2   | TREM2  | PLAC9   | CXCL13 |
| ZNF562 | TRPC6  | PLCG2   | CXCL14 |
|        | TSPAN8 | PLD4    | CXCL16 |
|        | UBE2C  | PLIN4   | CXCL17 |
|        | UPK1B  | PMP22   | CXCL5  |
|        | UPK3B  | PPARG   | CXCL8  |
|        | VSIG4  | PPP1R1A | CXCL9  |
|        | VWF    | PPP1R1B | CXCR1  |
|        | WFS1   | PPY     | CXCR2  |
|        | WNT2   | PRDM1   | CXCR3  |
|        | WT1    | PRF1    | CXCR4  |
|        |        | PRG4    | CXCR5  |
|        |        | PROX1   | CXCR6  |
|        |        | PTGDS   | CYP1B1 |
|        |        | PTN     | CYP2U1 |
|        |        | PTPRC   | CYSTM1 |
|        |        | PVALB   | CYTOR  |
|        |        | RAMP2   | DCN    |
|        |        | RAPGEF3 | DDC    |
|        |        | RBP5    | DDIT3  |
|        |        | RERGL   | DDR1   |
|        |        | RETN    | DDR2   |
|        |        | RGS16   | DDX58  |
|        |        | RIDA    | DHRS2  |
|        |        | RND1    | DLL1   |
|        |        | RTKN2   | DLL4   |
|        |        | S100A1  | DMBT1  |
|        |        | S100A12 | DNMT1  |
|        |        | SCGB2A1 | DNMT3A |
|        |        | SCGN    | DPP4   |
|        |        | SELE    | DPT    |
|        |        | SELL    | DST    |

---

---

|          |          |
|----------|----------|
| SEMA3C   | DUSP1    |
| SERPINB2 | DUSP2    |
| SERPINB3 | DUSP4    |
| SERPINB9 | DUSP5    |
| SFRP2    | DUSP6    |
| SFRP4    | EFNA1    |
| SFTA2    | EFNA4    |
| SH2D3C   | EFNA5    |
| SLAMF1   | EFNB1    |
| SLAMF7   | EFNB2    |
| SLC18A2  | EGF      |
| SLC22A8  | EGFR     |
| SLC26A2  | EIF5A/L1 |
| SLC26A3  | ELANE    |
| SLC4A1   | EMP3     |
| SMIM24   | ENG      |
| SMYD2    | ENO1     |
| SNAI1    | ENTPD1   |
| SNCA     | EOMES    |
| SNCG     | EPCAM    |
| SNTN     | EPHA2    |
| SOX17    | EPHA3    |
| SOX18    | EPHA4    |
| SOX2     | EPHA7    |
| SPDEF    | EPHB2    |
| SPI1     | EPHB3    |
| SPIB     | EPHB4    |
| SRPX     | EPHB6    |
| SST      | EPOR     |
| STC1     | ERBB2    |
| STC2     | ERBB3    |
| STEAP4   | ESAM     |
| TAC1     | ESR1     |
| TAT      | ETS1     |

---

---

|           |          |
|-----------|----------|
| TBX3      | ETV4     |
| TCF15     | ETV5     |
| TCF4      | EZH2     |
| TCIM      | EZR      |
| TCL1A     | FABP4    |
| TENT5C    | FABP5    |
| TFF2      | FAM30A   |
| TFPI      | FAP      |
| THAP2     | FAS      |
| THBS2     | FASLG    |
| THY1      | FASN     |
| TIMP4     | FAU      |
| TM4SF18   | FCER1G   |
| TM4SF4    | FCGBP    |
| TMC5      | FCGR3A/B |
| TMEM100   | FCRLA    |
| TMEM174   | FES      |
| TMEM52B   | FFAR2    |
| TNC       | FFAR3    |
| TNFRSF13B | FFAR4    |
| TNFRSF17  | FGF1     |
| TNFRSF9   | FGF12    |
| TOP2A     | FGF13    |
| TRAC      | FGF18    |
| TREM2     | FGF2     |
| TSPAN19   | FGF7     |
| UBE2C     | FGF9     |
| UMOD      | FGFR1    |
| UPK3B     | FGFR2    |
| VCAN      | FGFR3    |
| VSIG4     | FGG      |
| VWA5A     | FGR      |
| VWF       | FHIT     |
|           | FKBP11   |

---

---

FKBP5

FLT1

FLT3LG

FN1

FOS

FOXF1

FOXP3

FPR1

FYB1

FYN

FZD1

FZD3

FZD4

FZD5

FZD6

FZD7

FZD8

G0S2

G6PD

GADD45B

GAS6

GATA3

GC

GCG

GDF15

GLUD1

GLUL

GPLY

GPBAR1

GPER1

GPNMB

GPR183

GPX1

GPX3

---

---

GSK3B  
GSN  
GSTP1  
GZMA  
GZMB  
GZMH  
GZMK  
H2AZ1  
H4C3  
HAVCR2  
HBA1/2  
HBB  
HCAR2/3  
HCK  
HCST  
HDAC1  
HDAC11  
HDAC3  
HDAC4  
HDAC5  
HEXB  
HEY1  
HGF  
HIF1A  
HILPDA  
HLA-DPA1  
HLA-DPB1  
HLA-DQA1  
HLA-DQB1/2  
HLA-DRA  
HLA-DRB  
HMGB2  
HMGCS1  
HMGN2

---

---

HPGDS  
HSD17B2  
HSP90AA1  
HSP90AB1  
HSP90B1  
HSPA1A/B  
HSPB1  
HSPG2  
HTT  
IAPP  
ICA1  
ICAM1  
ICAM2  
ICAM3  
ICOS  
ICOSLG  
IDO1  
IER3  
IFI27  
IFI44L  
IFI6  
IFIH1  
IFIT1  
IFIT3  
IFITM1  
IFITM3  
IFNA1/13  
IFNAR1  
IFNAR2  
IFNG  
IFNGR1  
IFNGR2  
IFNL2/3  
IGF1

---

---

IGF1R  
IGF2  
IGF2R  
IGFBP3  
IGFBP5  
IGFBP6  
IGFBP7  
IGHA1  
IGHD  
IGHG1  
IGHG2  
IGHM  
IGKC  
IKZF3  
IL10  
IL10RA  
IL10RB  
IL11  
IL11RA  
IL12A  
IL12B  
IL12RB1  
IL12RB2  
IL13RA1  
IL15  
IL15RA  
IL16  
IL17A  
IL17B  
IL17D  
IL17RA  
IL17RB  
IL17RE  
IL18

---

---

IL18R1  
IL1A  
IL1B  
IL1R1  
IL1R2  
IL1RAP  
IL1RL1  
IL1RN  
IL2  
IL20  
IL20RA  
IL22RA1  
IL23A  
IL24  
IL27RA  
IL2RA  
IL2RB  
IL2RG  
IL32  
IL33  
IL34  
IL36G  
IL3RA  
IL4R  
IL6  
IL6R  
IL6ST  
IL7  
IL7R  
INHA  
INHBA  
INHBB  
INS  
INSIG1

---

---

INSR  
IRF3  
IRF4  
ISG15  
ITGA1  
ITGA2  
ITGA3  
ITGA5  
ITGA6  
ITGA8  
ITGA9  
ITGAE  
ITGAL  
ITGAM  
ITGAV  
ITGAX  
ITGB1  
ITGB2  
ITGB4  
ITGB5  
ITGB6  
ITGB8  
ITK  
ITM2A  
ITM2B  
JAG1  
JAK1  
JAK2  
JCHAIN  
JUN  
JUNB  
KDR  
KIT  
KITLG

---

---

KLF2  
KLK3  
KLRB1  
KLRF1  
KLRK1  
KRAS  
KRT1  
KRT10  
KRT13  
KRT14  
KRT15  
KRT16  
KRT17  
KRT18  
KRT19  
KRT20  
KRT23  
KRT4  
KRT5  
KRT6A/B/C  
KRT7  
KRT8  
KRT80  
KRT86  
LAG3  
LAIR1  
LAMA4  
LAMP2  
LAMP3  
LCN2  
LDB2  
LDHA  
LDLR  
LEFTY1

---

---

LEP  
LGALS1  
LGALS3  
LGALS3BP  
LGALS9  
LGR5  
LIF  
LIFR  
LINC01781  
LINC01857  
LINC02446  
LMNA  
LPAR5  
LTB  
LTBR  
LTF  
LUM  
LY6D  
LY75  
LYN  
LYVE1  
LYZ  
MAF  
MALAT1  
MAML2  
MAP1LC3B/2  
MAP2K1  
MAPK13  
MAPK14  
MARCKSL1  
MARCO  
MB  
MECOM  
MEG3

---

---

MERTK  
MET  
MFAP5  
MGP  
MHC I  
MIF  
MIR4435-2HG  
MKI67  
MMP1  
MMP12  
MMP14  
MMP19  
MMP2  
MMP7  
MMP9  
MPO  
MRC1  
MRC2  
MS4A1  
MS4A4A  
MS4A6A  
MSMB  
MSR1  
MST1R  
MT1X  
MT2A  
MTOR  
MX1  
MXRA8  
MYC  
MYH11  
MYH6  
MYL12A  
MYL4

---

---

MYL7  
MYL9  
MZB1  
MZT2A/B  
NACA  
NANOG  
NCAM1  
NCR1  
NDRG1  
NDUFA4L2  
NEAT1  
NELL2  
NFKB1  
NFKBIA  
NGFR  
NKG7  
NLRC4  
NLRC5  
NLRP1  
NLRP2  
NLRP3  
NOD2  
NOSIP  
NOTCH1  
NOTCH2  
NOTCH3  
NPPC  
NPR1  
NPR2  
NPR3  
NR1H2  
NR1H3  
NR2F2  
NR3C1

---

---

NRG1  
NRXN1  
NRXN3  
NTRK2  
NUPR1  
NUSAP1  
OAS1  
OAS2  
OAS3  
OASL  
OLFM4  
OLR1  
OSM  
OSMR  
P2RX5  
PARP1  
PCNA  
PDCD1  
PDCD1LG2  
PDGFA  
PDGFB  
PDGFC  
PDGFD  
PDGFRA  
PDGFRB  
PDS5A  
PECAM1  
PF4/V1  
PFN1  
PGF  
PGK1  
PGR  
PHLDA2  
PIGR

---

---

PLAC8  
PLAC9  
PLCG1  
PLD3  
PNOC  
POU5F1  
PPARA  
PPARD  
PPARG  
PPIA  
PRF1  
PROX1  
PRSS2  
PRTN3  
PSAP  
PSCA  
PSD3  
PTEN  
PTGDR2  
PTGDS  
PTGES  
PTGES2  
PTGES3  
PTGIS  
PTGS1  
PTGS2  
PTK2  
PTK6  
PTPRC  
PTPRCAP  
PTTG1  
PXDN  
QRFPR  
RAC1

---

---

RAC2  
RACK1  
RAG1  
RAMP1  
RAMP2  
RAMP3  
RARA  
RARB  
RARG  
RARRES1  
RARRES2  
RB1  
RBM47  
RBPJ  
REG1A  
RELA  
RELT  
RGCC  
RGS1  
RGS13  
RGS2  
RGS5  
RNF43  
ROR1  
RORA  
RPL21  
RPL22  
RPL32  
RPL34  
RPL37  
RPS4Y1  
RSPO3  
RUNX3  
RXRA

---

---

RXRB  
RYK  
RZR2  
S100A10  
S100A2  
S100A4  
S100A6  
S100A8  
S100A9  
S100B  
S100P  
SAA1/2  
SAT1  
SCG5  
SCGB3A1  
SEC23A  
SEC61G  
SELENOP  
SELL  
SELPLG  
SERPINA1  
SERPINA3  
SERPINB5  
SERPINH1  
SFN  
SH3BGRL3  
SIGIRR  
SLA  
SLC2A1  
SLC40A1  
SLCO2B1  
SLPI  
SMAD2  
SMAD3

---

---

SMAD4  
SMARCB1  
SMO  
SNAI1  
SNAI2  
SOD1  
SOD2  
SORBS1  
SOSTDC1  
SOX2  
SOX4  
SOX9  
SPARCL1  
SPINK1  
SPOCK2  
SPP1  
SPRY2  
SPRY4  
SQLE  
SQSTM1  
SRC  
SREBF1  
SRGN  
SRSF2  
SST  
ST6GAL1  
ST6GALNAC3  
STAT1  
STAT3  
STAT4  
STAT5A  
STAT5B  
STAT6  
STMN1

---



---

TNFRSF10B  
TNFRSF10D  
TNFRSF11A  
TNFRSF11B  
TNFRSF12A  
TNFRSF13B  
TNFRSF14  
TNFRSF17  
TNFRSF18  
TNFRSF19  
TNFRSF1A  
TNFRSF1B  
TNFRSF21  
TNFRSF4  
TNFRSF9  
TNFSF10  
TNFSF12  
TNFSF13B  
TNFSF14  
TNFSF15  
TNFSF4  
TNFSF8  
TNFSF9  
TNNC1  
TNNT2  
TNXA/B  
TOP2A  
TOX  
TP53  
TPI1  
TPM1  
TPM2  
TPSAB1/B2  
TPT1

---

---

TSC22D1  
TSHZ2  
TTN  
TTR  
TUBB  
TUBB4B  
TWIST1  
TWIST2  
TXK  
TYK2  
TYMS  
TYROBP  
UBA52  
UBE2C  
UPK3A  
VCAM1  
VCAN  
VEGFA  
VEGFB  
VEGFC  
VEGFD  
VHL  
VIM  
VPREB3  
VSIR  
VTN  
VWA1  
VWF  
WIF1  
WNT10B  
WNT11  
WNT3  
WNT5A  
WNT5B

---

---

WNT7A

WNT7B

WNT9A

XBP1

XCL1/2

XKR4

YBX3

YES1

ZBTB16

ZFP36

---

**Supplementary Table 4:** Metrics by each run, combination of platform, panel, and TMA.

| TMA    | Platform | Panel        | Data collection date (Year: 2023) | Days after slicing | Cores with data | Cores with data (%) | Cell count (k) | Total transcripts (million) | Transcript per cell | Cells per 1000 $\mu$ m <sup>2</sup> | Good cells (% transcripts>10 per cell) | Good cells (% transcripts>20 per cell) |
|--------|----------|--------------|-----------------------------------|--------------------|-----------------|---------------------|----------------|-----------------------------|---------------------|-------------------------------------|----------------------------------------|----------------------------------------|
| Tumor  | Xenium   | Breast       | May-10                            | 6                  | 169             | 97.7                | 399.3          | 46.6                        | 116.6               | 7.4                                 | 97.4                                   | 92.8                                   |
|        | Xenium   | Multi-tissue | May-25                            | 21                 | 159             | 91.9                | 379.5          | 33.8                        | 89.2                | 7.2                                 | 97.1                                   | 91.7                                   |
|        | Xenium   | Lung         | Jun-16                            | 43                 | 149             | 86.1                | 360.8          | 28.2                        | 78.2                | 7.1                                 | 95.1                                   | 86.7                                   |
|        | CosMx    | 1K           | Jun-17                            | 44                 | 163             | 94.2                | 240.2          | 22.3                        | 92.8                | 5.0                                 | 93.2                                   | 83.4                                   |
|        | MERSCOPE | Breast       | Jul-17                            | 74                 | 107             | 61.8                | 232.4          | 13.2                        | 56.8                | 6.1                                 | 68.5                                   | 57.9                                   |
|        | MERSCOPE | Lung         | May-25                            | 21                 | 96              | 55.5                | 274.0          | 2.4                         | 8.8                 | 4.8                                 | 25.8                                   | 12.3                                   |
| Normal | Xenium   | Breast       | May-10                            | 6                  | 48              | 100.0               | 300.9          | 14.7                        | 49.0                | 2.2                                 | 84.0                                   | 71.5                                   |
|        | Xenium   | Multi-tissue | May-25                            | 21                 | 48              | 100.0               | 292.7          | 11.7                        | 39.9                | 2.3                                 | 84.3                                   | 68.5                                   |
|        | Xenium   | Lung         | Jun-16                            | 43                 | 48              | 100.0               | 252.6          | 8.5                         | 33.5                | 2.0                                 | 77.4                                   | 58.8                                   |
|        | CosMx    | 1K           | Jun-17                            | 44                 | 47              | 97.9                | 178.4          | 8.4                         | 47.0                | 2.2                                 | 86.8                                   | 67.1                                   |
|        | MERSCOPE | Breast       | Jul-17                            | 74                 | 38              | 79.2                | 164.0          | 0.2                         | 1.5                 | 0.2                                 | 2.4                                    | 0.6                                    |
|        | MERSCOPE | Lung         | May-23                            | 19                 | 45              | 93.8                | 255.3          | 0.1                         | 0.4                 | 0.3                                 | 0.1                                    | 0.0                                    |

**Supplementary Table 5:** Number of genes detected two standard deviations above the average expression of the negative control probes. The max value of each tissue type was bolded.

| <b>Platform<br/>(panel)<br/>Tissue Type\</b> | <b>CosMx<br/>1k</b> | <b>MERSCOPE<br/>breast</b> | <b>MERSCOPE<br/>lung</b> | <b>Xenium<br/>breast</b> | <b>Xenium<br/>lung</b> | <b>Xenium<br/>multi-tissue</b> |
|----------------------------------------------|---------------------|----------------------------|--------------------------|--------------------------|------------------------|--------------------------------|
| Bladder                                      | <b>246</b>          | 101                        | 123                      | 154                      | 243                    | 208                            |
| BrC                                          | <b>526</b>          | 138                        | 90                       | 265                      | 271                    | 346                            |
| Breast                                       | <b>431</b>          | 98                         | 91                       | 230                      | 270                    | 347                            |
| CRC                                          | <b>503</b>          | 154                        | 122                      | 252                      | 274                    | 343                            |
| Colon                                        | 241                 | 101                        | 74                       | 210                      | 267                    | <b>311</b>                     |
| HNSCC                                        | <b>394</b>          | 130                        | 107                      | 257                      | 235                    | 332                            |
| Heart                                        | 218                 | 29                         | 46                       | 162                      | 185                    | <b>243</b>                     |
| Kidney                                       | 165                 | 155                        | 118                      | 272                      | 276                    | <b>359</b>                     |
| Liver                                        | 192                 | 112                        | 91                       | 246                      | 272                    | <b>346</b>                     |
| Lung                                         | 170                 | 27                         | 41                       | 228                      | 276                    | <b>325</b>                     |
| Lymph node                                   | 197                 | 85                         | 53                       | 190                      | 274                    | <b>336</b>                     |
| Mel                                          | <b>412</b>          | 106                        | 77                       | 265                      | 265                    | 343                            |
| NSCLC                                        | <b>406</b>          | 145                        | 95                       | 267                      | 281                    | 345                            |
| OvC                                          | <b>503</b>          | 180                        | 109                      | 262                      | 279                    | 357                            |
| Ovary                                        | <b>566</b>          | 203                        | 144                      | 270                      | 286                    | 347                            |
| Prostate                                     | <b>505</b>          | 185                        | 150                      | 247                      | 287                    | 356                            |
| Skin                                         | <b>417</b>          | 66                         | 95                       | 270                      | 281                    | 367                            |
| Spleen                                       | 157                 | 21                         | 48                       | 279                      | 283                    | <b>369</b>                     |
| Thyroid                                      | <b>675</b>          | 136                        | 129                      | 275                      | 287                    | 369                            |
| Tonsil                                       | <b>569</b>          | 144                        | 126                      | 246                      | 261                    | 361                            |

**Supplementary Table 6:** Number of segmented cells per 1000  $\mu\text{m}^2$  by tissue type and by platform x panel combination.

| <b>Platform<br/>(panel)<br/>Tissue Type\</b> | <b>CosMx<br/>1k</b> | <b>MERSCOPE<br/>breast</b> | <b>MERSCOPE<br/>lung</b> | <b>Xenium<br/>breast</b> | <b>Xenium<br/>lung</b> | <b>Xenium<br/>multi-tissue</b> |
|----------------------------------------------|---------------------|----------------------------|--------------------------|--------------------------|------------------------|--------------------------------|
| Bladder                                      | 1.83                | 0.70                       | 0.36                     | 1.53                     | 1.17                   | 1.65                           |
| BrC                                          | 4.65                | 6.87                       | 4.81                     | 7.48                     | 7.33                   | 7.73                           |
| Breast                                       | 1.91                | 0.06                       | 0.18                     | 0.46                     | 1.00                   | 0.65                           |
| CRC                                          | 5.26                | 6.49                       | 5.34                     | 8.62                     | 7.69                   | 8.41                           |
| Colon                                        | 2.40                | 0.43                       | 0.27                     | 3.29                     | 2.64                   | 3.21                           |
| HNSCC                                        | 4.44                | 4.61                       | 2.70                     | 6.43                     | 5.53                   | 4.76                           |
| Heart                                        | 0.71                | 0.20                       | 0.20                     | 1.04                     | 0.94                   | 0.95                           |
| Kidney                                       | 2.95                | 1.27                       | 0.40                     | 4.00                     | 3.42                   | 3.83                           |
| Liver                                        | 2.23                | 0.57                       | 0.85                     | 2.14                     | 1.96                   | 2.06                           |
| Lung                                         | 0.29                | 0.07                       | 0.03                     | 0.70                     | 0.54                   | 0.62                           |
| Lymph node                                   | 0.51                | 0.08                       | 0.06                     | 0.19                     | 0.19                   | 0.23                           |
| Mel                                          | 7.27                | 5.02                       | 2.77                     | 9.66                     | 9.01                   | 7.78                           |
| NSCLC                                        | 4.56                | 4.83                       | 3.78                     | 6.70                     | 6.15                   | 7.54                           |
| OvC                                          | 6.43                | 11.40                      | 9.69                     | 13.29                    | 12.38                  | 12.07                          |
| Ovary                                        | 2.49                | 1.20                       | 0.80                     | 2.74                     | 2.19                   | 2.52                           |
| Prostate                                     | 3.32                | 0.79                       | 0.89                     | 3.68                     | 3.81                   | 3.98                           |
| Skin                                         | 2.18                | 0.12                       | 0.13                     | 1.73                     | 1.36                   | 1.61                           |
| Spleen                                       | 9.57                | 1.69                       | 1.63                     | 15.39                    | 10.98                  | 15.66                          |
| Thyroid                                      | 0.71                | 0.13                       | 0.53                     | 2.68                     | 2.91                   | 2.34                           |
| Tonsil                                       | 10.89               | 0.45                       | 2.79                     | 17.39                    | 13.87                  | 15.27                          |

**Supplementary Table 7:** Area of segmented cells ( $\mu\text{m}^2$ ) by tissue type and by platform x panel combination.

| <b>Platform<br/>(panel)<br/>Tissue Type\</b> | <b>CosMx<br/>1k</b> | <b>MERSCOPE<br/>breast</b> | <b>MERSCOPE<br/>lung</b> | <b>Xenium<br/>breast</b> | <b>Xenium<br/>lung</b> | <b>Xenium<br/>multi-tissue</b> |
|----------------------------------------------|---------------------|----------------------------|--------------------------|--------------------------|------------------------|--------------------------------|
| Bladder                                      | 190.70              | 85.59                      | 79.70                    | 343.30                   | 345.11                 | 342.01                         |
| BrC                                          | 125.11              | 72.00                      | 70.84                    | 112.78                   | 112.78                 | 102.25                         |
| Breast                                       | 143.24              | 75.28                      | 72.78                    | 169.79                   | 130.16                 | 151.72                         |
| CRC                                          | 112.28              | 63.51                      | 59.65                    | 95.82                    | 94.38                  | 93.45                          |
| Colon                                        | 149.24              | 77.97                      | 76.65                    | 148.86                   | 161.37                 | 158.59                         |
| HNSCC                                        | 147.56              | 86.03                      | 79.98                    | 153.17                   | 162.52                 | 152.52                         |
| Heart                                        | 220.02              | 91.58                      | 71.24                    | 467.37                   | 500.59                 | 500.80                         |
| Kidney                                       | 120.74              | 93.91                      | 82.64                    | 153.01                   | 159.63                 | 158.23                         |
| Liver                                        | 191.43              | 90.36                      | 84.06                    | 271.66                   | 285.82                 | 292.68                         |
| Lung                                         | 188.86              | 97.83                      | 79.77                    | 199.12                   | 226.95                 | 207.36                         |
| Lymph node                                   | 257.20              | 68.82                      | 78.16                    | 486.36                   | 397.09                 | 495.19                         |
| Mel                                          | 102.05              | 67.47                      | 61.26                    | 89.21                    | 88.84                  | 85.16                          |
| NSCLC                                        | 107.51              | 78.64                      | 73.08                    | 95.62                    | 92.70                  | 97.06                          |
| OvC                                          | 98.24               | 53.13                      | 54.49                    | 68.23                    | 68.35                  | 67.31                          |
| Ovary                                        | 178.76              | 93.12                      | 81.93                    | 191.55                   | 224.82                 | 210.95                         |
| Prostate                                     | 110.00              | 59.28                      | 61.05                    | 108.29                   | 100.63                 | 100.68                         |
| Skin                                         | 140.62              | 89.73                      | 70.81                    | 173.97                   | 166.38                 | 166.79                         |
| Spleen                                       | 57.24               | 57.76                      | 57.32                    | 47.16                    | 48.00                  | 46.04                          |
| Thyroid                                      | 57.24               | 44.74                      | 43.52                    | 41.50                    | 39.69                  | 43.64                          |
| Tonsil                                       | 53.22               | 47.01                      | 45.48                    | 33.57                    | 34.30                  | 33.55                          |

**Supplementary Table 8:** Pearson correlation results of tumor TMA and TCGA database across all panels.

| <b>Platform<br/>(panel)<br/>Cancer Type\</b> | <b>Xenium<br/>multi-tissue</b> | <b>Xenium<br/>breast</b> | <b>Xenium<br/>lung</b> | <b>MERSCOPE<br/>breast</b> | <b>MERSCOPE<br/>lung</b> | <b>CosMx<br/>1k</b> |
|----------------------------------------------|--------------------------------|--------------------------|------------------------|----------------------------|--------------------------|---------------------|
| Bladder cancer                               | 0.64                           | 0.72                     | 0.69                   | 0.66                       | NaN                      | 0.64                |
| Breast cancer                                | 0.65                           | 0.66                     | 0.70                   | 0.71                       | 0.76                     | 0.66                |
| CRC                                          | 0.75                           | 0.77                     | 0.76                   | 0.74                       | 0.73                     | 0.66                |
| HNSCC                                        | 0.76                           | 0.78                     | 0.77                   | 0.73                       | 0.68                     | 0.69                |
| Melanoma                                     | 0.65                           | 0.58                     | 0.63                   | 0.61                       | 0.59                     | 0.60                |
| NSCLC                                        | 0.69                           | 0.75                     | 0.59                   | 0.73                       | 0.52                     | 0.63                |
| Ovarian cancer                               | 0.69                           | 0.71                     | 0.73                   | 0.74                       | 0.75                     | 0.71                |

**Supplementary Table 9:** Pearson correlation results of normal TMA and GTEx database across all panels.

| <b>Platform<br/>(panel)<br/>Tissue Type\</b> | <b>Xenium<br/>multi-tissue</b> | <b>Xenium<br/>breast</b> | <b>Xenium<br/>lung</b> | <b>MERSCOPE<br/>breast</b> | <b>MERSCOPE<br/>lung</b> | <b>CosMx<br/>1k</b> |
|----------------------------------------------|--------------------------------|--------------------------|------------------------|----------------------------|--------------------------|---------------------|
| Bladder                                      | 0.64                           | 0.64                     | 0.59                   | 0.44                       | 0.49                     | 0.58                |
| Breast                                       | 0.68                           | 0.71                     | 0.58                   | 0.36                       | 0.50                     | 0.69                |
| Colon                                        | 0.57                           | 0.61                     | 0.55                   | 0.40                       | 0.40                     | 0.61                |
| Heart                                        | 0.75                           | 0.77                     | 0.76                   | 0.12                       | -0.05                    | 0.55                |
| Kidney                                       | 0.72                           | 0.76                     | 0.74                   | 0.63                       | 0.69                     | 0.50                |
| Liver                                        | 0.82                           | 0.85                     | 0.81                   | 0.56                       | 0.60                     | 0.69                |
| Lung                                         | 0.74                           | 0.79                     | 0.69                   | 0.06                       | 0.18                     | 0.53                |
| Lymph node                                   | 0.41                           | 0.41                     | 0.32                   | 0.18                       | 0.38                     | 0.38                |
| Ovary                                        | 0.54                           | 0.56                     | 0.48                   | 0.49                       | 0.60                     | 0.69                |
| Prostate                                     | 0.80                           | 0.81                     | 0.80                   | NaN                        | 0.72                     | 0.77                |
| Skin                                         | 0.72                           | 0.82                     | 0.79                   | 0.37                       | 0.54                     | 0.68                |
| Spleen                                       | 0.76                           | 0.81                     | 0.74                   | 0.04                       | 0.13                     | 0.35                |
| Thyroid                                      | 0.17                           | 0.23                     | 0.19                   | 0.31                       | 0.34                     | 0.44                |
| Tonsil                                       | 0.77                           | 0.79                     | 0.79                   | 0.61                       | 0.58                     | 0.72                |
| Pancreas                                     | 0.23                           | 0.34                     | 0.16                   | NaN                        | 0.27                     | 0.41                |

**Supplementary Table 10:** Example of gene level data.

| <b>Core</b> | <b>Gene</b> | <b>Tissue type</b> | <b>Count</b> | <b>Code type</b> |
|-------------|-------------|--------------------|--------------|------------------|
| 1           | AATK        | Bladder            | 17           | gene             |
| 1           | ABL1        | Bladder            | 30           | gene             |
| 1           | ABL2        | Bladder            | 22           | gene             |
| 1           | ACACB       | Bladder            | 27           | gene             |
| 1           | ACE         | Bladder            | 21           | gene             |
| 1           | ACKR1       | Bladder            | 12           | gene             |
| 1           | ACKR3       | Bladder            | 35           | gene             |
| 1           | ACKR4       | Bladder            | 30           | gene             |
| 1           | ACP5        | Bladder            | 76           | gene             |
| 1           | ACTA2       | Bladder            | 31           | gene             |
| 1           | ACTG2       | Bladder            | 11           | gene             |

**Supplementary Table 11:** Example of cell level data.

| cell_id    | transcript_counts | control_probe_counts | control_codeword_counts | unassigned_codeword_counts | total_counts | cell_area | nucleus_area | x        | y     | core | tissue_type | geometry                                     |
|------------|-------------------|----------------------|-------------------------|----------------------------|--------------|-----------|--------------|----------|-------|------|-------------|----------------------------------------------|
| aaaabane-1 | 213               | 0                    | 0                       | 0                          | 213          | 116.01    | 39.78        | 7,428.87 | 21.81 | 61   | HNSCC       | POINT (7428.874658203124 21.810035228729248) |
| aaaagnbb-1 | 139               | 0                    | 0                       | 0                          | 139          | 118.67    | 10.25        | 7,428.12 | 4.89  | 61   | HNSCC       | POINT (7428.116796875 4.891704702377319)     |
| aaabnncg-1 | 251               | 0                    | 0                       | 1                          | 252          | 136.64    | 71.03        | 7,437.15 | 19.53 | 61   | HNSCC       | POINT (7437.15302734375 19.53349733352661)   |
| aaabnnhb-1 | 107               | 0                    | 0                       | 0                          | 107          | 60.64     | 12.51        | 7,436.43 | 10.70 | 61   | HNSCC       | POINT (7436.42919921875 10.702136468887328)  |
| aaabojgn-1 | 163               | 0                    | 0                       | 0                          | 163          | 156.11    | 33.82        | 7,443.17 | 4.72  | 61   | HNSCC       | POINT (7443.172753906249 4.719903254508972)  |
| aaacafik-1 | 633               | 0                    | 0                       | 0                          | 633          | 342.15    | 153.03       | 7,452.35 | 17.53 | 61   | HNSCC       | POINT (7452.350927734375 17.53206386566162)  |
| aaaccjoo-1 | 184               | 0                    | 0                       | 0                          | 184          | 86.20     | 24.66        | 7,454.67 | 26.94 | 61   | HNSCC       | POINT (7454.669335937499 26.943363189697266) |
| aaacdggg-1 | 89                | 0                    | 0                       | 0                          | 89           | 60.87     | 12.24        | 7,460.32 | 29.56 | 61   | HNSCC       | POINT (7460.318017578124 29.56240882873535)  |
| aaacdmce-1 | 290               | 0                    | 0                       | 0                          | 290          | 245.24    | 56.54        | 7,464.75 | 4.88  | 61   | HNSCC       | POINT (7464.747314453125 4.880907201766967)  |
| aaaceomi-1 | 140               | 0                    | 0                       | 0                          | 140          | 99.52     | 28.18        | 7,466.66 | 23.29 | 61   | HNSCC       | POINT (7466.6623046875 23.29304599761963)    |

**Supplementary Table 12:** Example of cell by gene data.

| <b>cell_id</b>               | <b>core</b> | <b>tissue_type</b> | <b>ABCC11</b> | <b>ADAM9</b> | <b>ADGRE5</b> | <b>ADH1B</b> | <b>...</b> | <b>ZEB1</b> | <b>ZEB2</b> | <b>ZNF562</b> |
|------------------------------|-------------|--------------------|---------------|--------------|---------------|--------------|------------|-------------|-------------|---------------|
| 3003241900002100003_region_1 | 124         | NSCLC              | 0             | 0            | 0             | 0            | ...        | 0           | 0           | 0             |
| 3003241900002100004_region_1 | 124         | NSCLC              | 0             | 0            | 0             | 0            | ...        | 0           | 0           | 0             |
| 3003241900002100006_region_1 | 124         | NSCLC              | 0             | 0            | 0             | 0            | ...        | 0           | 0           | 0             |
| 3003241900002100007_region_0 | 61          | HNSCC              | 0             | 0            | 1             | 0            | ...        | 0           | 0           | 0             |
| 3003241900002100007_region_1 | 124         | NSCLC              | 0             | 0            | 0             | 0            | ...        | 0           | 0           | 0             |
| 3003241900002100008_region_1 | 124         | NSCLC              | 0             | 0            | 0             | 0            | ...        | 0           | 0           | 0             |
| 3003241900002100009_region_0 | 61          | HNSCC              | 0             | 0            | 0             | 0            | ...        | 0           | 0           | 0             |
| 3003241900002100010_region_0 | 61          | HNSCC              | 0             | 0            | 0             | 0            | ...        | 1           | 2           | 0             |
| 3003241900002100010_region_1 | 124         | NSCLC              | 0             | 0            | 0             | 0            | ...        | 0           | 0           | 0             |
| 3003241900002100011_region_0 | 61          | HNSCC              | 0             | 0            | 0             | 0            | ...        | 0           | 0           | 0             |
